# Supplementary material for: Ultrasensitive photochromic and Raman dual response to ethylenediamine gas through polyoxometalate–viologen crystalline hybrid
Source: Royal Society of Chemistry journal article supplement (doi:10.1039/d2tc03053e), 2022-01-01
Supplement: d2tc03053e1.pdf [file d2tc03053e1.pdf]

*Supporting Information*

**Ultrasensitive Photochromic and Raman Dual Response to  
Ethylenediamine Gas through Polyoxometalate-Viologen  
Crystalline Hybrid**

Xi-Zhu Zhang,<sup>a</sup> Wen-Jing Zhu,<sup>a</sup> Zhong-Xi Yang,<sup>a</sup> Yi Feng,<sup>a</sup> Lin-Lin Fan,<sup>a</sup>  
Guang-Gang Gao<sup>\*a</sup> and Hong Liu<sup>\*a</sup>

<sup>a</sup> *School of Materials Science and Engineering, University of Jinan, Jinan, 250022,  
China.*

*\* Corresponding author.*

*E-mail: mse\_gaogg@ujn.edu.cn (G.-G. Gao), mse\_liuh@ujn.edu.cn (H. Liu)*

# Contents

**Chemicals and materials**

**Characterization methods**

**Raman and UV-vis detection**

**Photo-fatigue resistance**

**Supporting Figures**

**Fig. S1** Experimental and simulated PXRD patterns of complex **1**.

**Fig. S2** FTIR spectra of complex **1**,  $P_2W_{18}$  and AV.

**Fig. S3** TGA curve of complex **1** under  $N_2$  atmosphere.

**Fig. S4** FTIR spectra of complex **1** before and after ultraviolet light irradiation.

**Fig. S5** PXRD patterns of complex **1** before and after ultraviolet light irradiation.

**Fig. S6** XPS spectra of complex **1** before and after ultraviolet light irradiation: (a) N 1s, (b) P 2p, (c) W 4f and (d) O 1s.

**Fig. S7** Raman spectra of  $P_2W_{18}$  upon different irradiation time.

**Fig. S8** Photograph of the photo-printed paper with a UJN motif and its bleaching after 3 days and 7 days.

**Fig. S9** The Number Cycles of photochromism.

**Fig. S10** Cyclic voltammogram of  $P_2W_{18}$  and complex **1** in 0.5 M  $H_2SO_4$  aqueous solution.

**Fig. S11** Transient photocurrent responses of  $P_2W_{18}$  and complex **1**

obtained with ultraviolet light at no constant bias in 0.5 M H<sub>2</sub>SO<sub>4</sub> aqueous solution.

**Fig. S12** Electrochemical impedance spectra (EIS) of P<sub>2</sub>W<sub>18</sub> and complex **1** at an overpotential of 200 mV.

**Fig. S13** UV-vis absorbance spectra of complex **1** after treatment with different solvents.

**Fig. S14** Color changes and UV-vis absorbance spectra of AV and P<sub>2</sub>W<sub>18</sub> after treatment with EDA gas (30 ppm).

**Fig. S15** ESR spectra of complex **1** before and after reaction with EDA gas.

**Fig. S16** FTIR spectra of complex **1** before and after reaction with EDA gas.

**Fig. S17** PXRD patterns of complex **1** before and after reaction with EDA gas.

**Fig. S18** PXRD patterns of P<sub>2</sub>W<sub>18</sub> upon different irradiation time.

**Fig. S19** Color changes (a) and UV-vis spectra (b) of **1** via different visible light (>400nm) irradiation time.

**Fig. S20** Raman spectra of complex **1**, AV and P<sub>2</sub>W<sub>18</sub>.

**Fig. S21** TEM diagram of complex **1** before (a, b) and after irradiation (c) and after EDA treatment (d).

**Table S1** Crystal Data and Structure Refinements for complex **1**

**Table S2** Selected bond lengths (Å) for complex **1**

## Chemicals and materials

All chemicals and solvents obtained from suppliers were used without further purification.  $K_6P_2W_{18}O_{62} \cdot 14H_2O$  ( $P_2W_{18}$ ) and N, N'-bis( $\delta$ -aminopropyl)-4,4'-bipyridinium bromide hydrobromide ( $AV^{2+}$ ) were prepared as described by published procedures.<sup>[1,2]</sup> Elem. Anal. calcd for  $C_{16}H_{43}N_4O_{71.5}P_2W_{18}$ : C, 3.99; H, 0.89; N, 1.17; W, 68.85%. Found: C, 3.93; H, 0.87; N, 1.08; W, 68.77%.

## Characterization methods

Crystal data were collected on an Agilent Technology Eos Dual system with focusing multilayer mirror optics and a Cu  $K\alpha$  source of  $\lambda = 1.54184 \text{ \AA}$ . Data collection and reduction were performed using the program CrysAlisPro<sup>[3]</sup>. The intensities were corrected for absorption using the empirical method implemented in SCALE3 ABSPACK scaling algorithm. The structures were solved with intrinsic phasing methods (SHELXT-2015)<sup>[4]</sup>, and refined by full-matrix least-squares on  $F^2$  using OLEX2,<sup>[5]</sup> which utilizes the SHELXL-2015 module.<sup>[5]</sup> The positions of the metal atoms and their first coordination spheres were located from direct-methods. Other non-hydrogen atoms were found in alternating difference Fourier syntheses and least-squares refinement cycles. During the final cycles, except for some solvent molecules, all other non-hydrogen atoms were refined anisotropically. Hydrogen atoms were placed in calculated positions refined using idealized geometries and assigned fixed isotropic displacement parameters. The crystal structures are visualized by DIAMOND 3.2.<sup>[6]</sup> Crystallographic data of complex **1** was delivered to the

Cambridge Crystallographic Data Centre (CCDC) and assigned No. 2091528. Powder X-ray diffraction (PXRD) was performed using a D8 Discover (Bruker) diffractometer in Bragg-Brentano geometry (Cu K $\alpha$  radiation,  $\lambda = 1.5418 \text{ \AA}$ ). Data was recorded for the  $2\theta$  range from  $5^\circ$  to  $80^\circ$  in steps of  $0.05^\circ$  using an integration time of 1s. The FT-IR spectra were measured on a Nicolet 6700 spectrophotometer using KBr pellets in the range of 4000 to  $500 \text{ cm}^{-1}$ . UV-vis absorption spectra were measured in the reflectance mode at room temperature on a SHIMADZU UV-8000S spectrophotometer with an integrating sphere attachment and BaSO<sub>4</sub> as a reference. The X-ray photoelectron spectrum (XPS) was collected on an ESCA-LAB-MKII spectrometer (UK) to confirm the elemental composition and valence states. Transient photocurrent response tests were carried out using a CHI660E electrochemical workstation with a three-electrode system, in which a glassy carbon electrode was used as the working electrode, a platinum wire as the auxiliary electrode, and an Ag/AgCl electrode as the reference electrode. Raman test was performed using a Raman spectrometer (Labramis, Horiba Jobbin Yvon, Paris, France) with wavelength of 532 nm. The electron paramagnetic resonance spectrometer (EPR) was recorded at the X-band frequency (9.867 GHz) on a Bruker EMXplus-6/1 spectrometer. Xenon lamp ( $300\text{W } 2.4 \text{ W cm}^{-2}$ ).

## **Raman and UV-vis detection**

Various concentrations of ethylenediamine solution were obtained by continuously diluting the standard solution with ethanol. In the test experiment, crystals were first ground into powder and the fine powders with dispersing in

ethanol solution were drop-casted on the filtrate paper. In a clean and sealed conical flask, it was dropped into EDA solution, and then put the sample disc into the flask and seal it quickly, and then heated it to 60 °C for 4 hours to ensure complete volatilization of the gas. Finally, sample disc was pasted on a glass plate for detection by confocal Raman microscopy and UV-vis spectroscopy.

### **Photo-fatigue resistance**

The complex 1 was irradiated by Xenon lamp for 10 minutes to become dark blue. Then, the sample after irradiation was heated at 80 °C for 15 minutes leading to the decoloration. Both the coloration and decoloration states can be detected by UV-vis spectra. Moreover, the maximum absorbance at 760 nm was selected for monitoring the coloration-decoloration cycles.

## Supporting figures

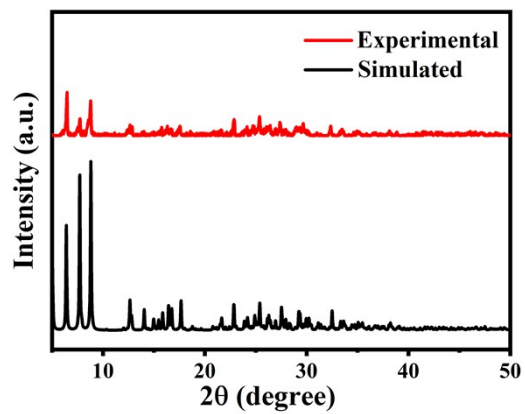

**Fig. S1** Experimental and simulated PXRD patterns of complex 1.

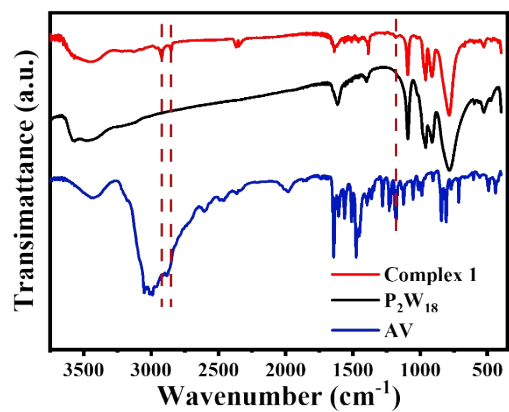

**Fig. S2** FTIR spectra of complex **1**, P<sub>2</sub>W<sub>18</sub> and AV.



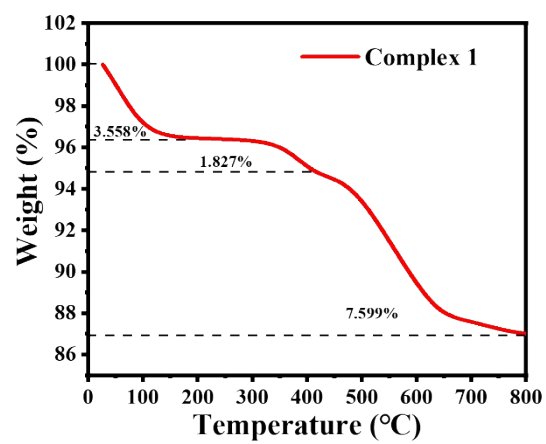

**Fig. S3** TGA curve of complex 1 under N<sub>2</sub> atmosphere.

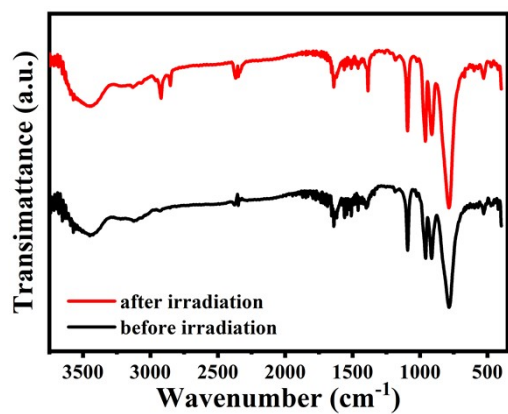

**Fig. S4** FTIR spectra of complex **1** before and after ultraviolet light irradiation.

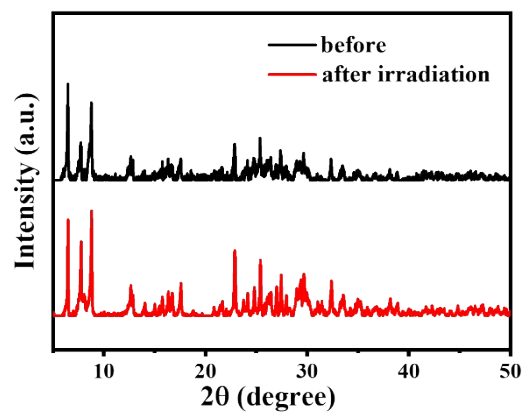

**Fig. S5** PXRd patterns of complex **1** before and after ultraviolet light irradiation.

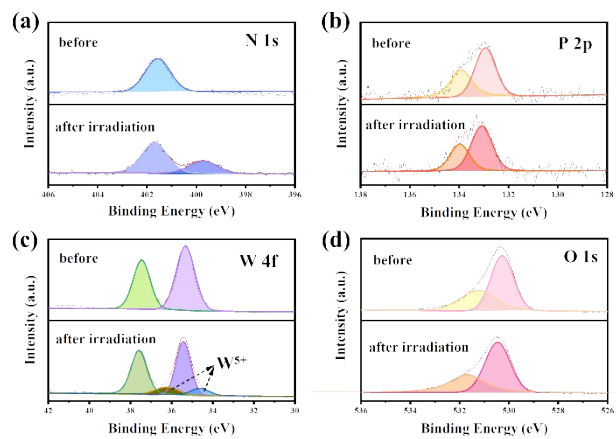

**Fig. S6** XPS spectra of complex **1** before and after ultraviolet light irradiation: (a) N 1s, (b) P 2p, (c) W 4f and (d) O 1s.

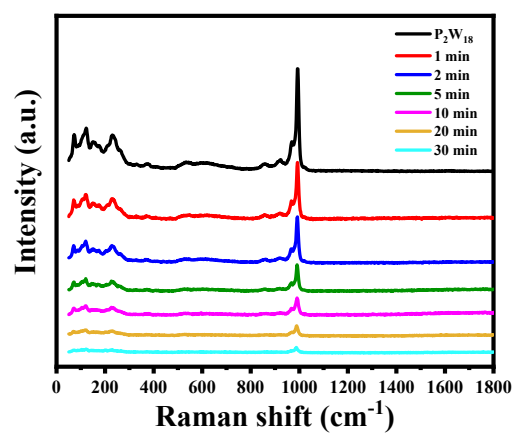

**Fig. S7** Raman spectra of  $P_2W_{18}$  upon different irradiation time.

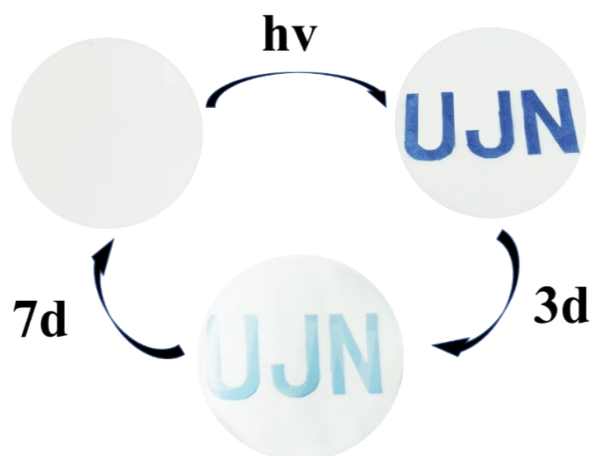

**Fig. S8** Photograph of the photo-printed paper with a UJN motif and its bleaching after 3 and 7 days.

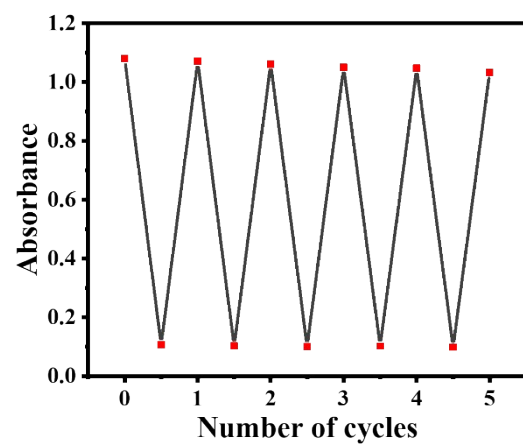

**Fig. S9** The Number Cycles of photochromism.

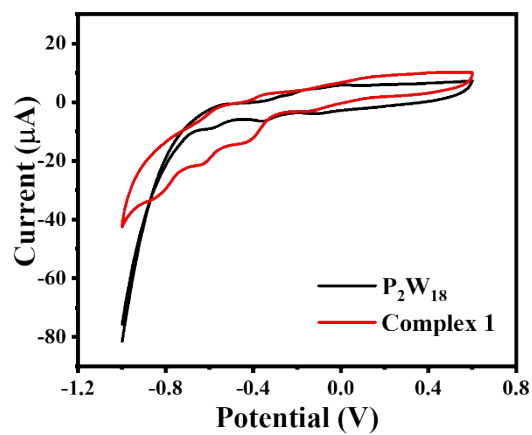

**Fig. S10** Cyclic voltammogram of P<sub>2</sub>W<sub>18</sub> and complex **1** in 0.5 M H<sub>2</sub>SO<sub>4</sub> aqueous solution.



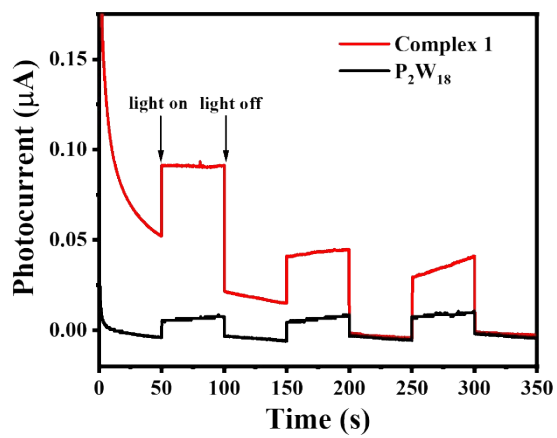

**Fig. S11** Transient photocurrent responses of P<sub>2</sub>W<sub>18</sub> and complex **1** obtained with ultraviolet light at no constant bias in 0.5 M H<sub>2</sub>SO<sub>4</sub> aqueous solution.

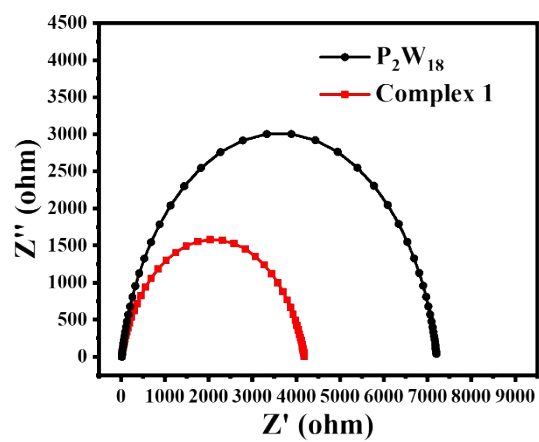

**Fig. S12** Electrochemical impedance spectra (EIS) of P<sub>2</sub>W<sub>18</sub> and complex 1 at an overpotential of 200 mV.

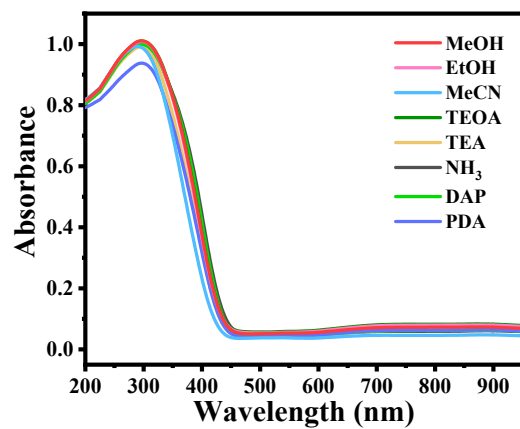

**Fig. S13** UV-vis absorbance spectra of complex **1** after treatment with different solvents.

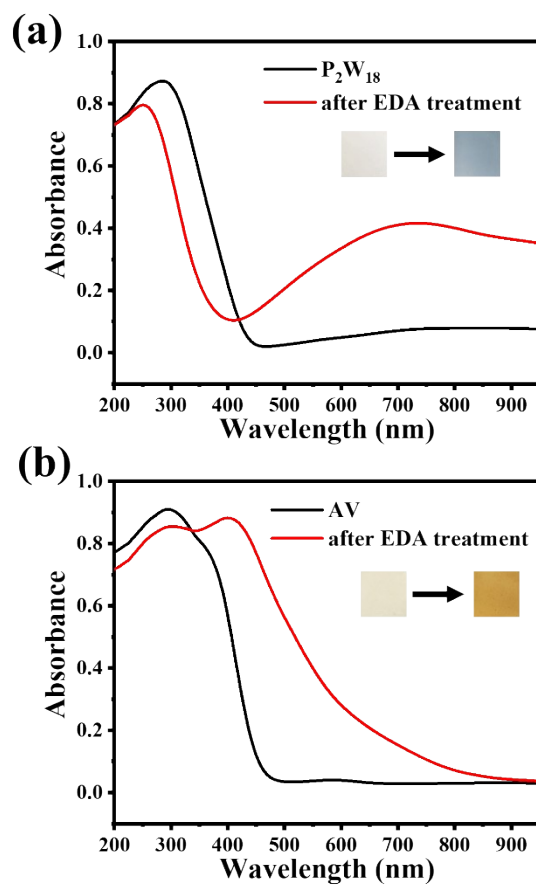

**Fig. S14** Color changes and UV-vis absorbance spectra of  $P_2W_{18}$ (a) and AV(b) after treatment with EDA gas (30 ppm).

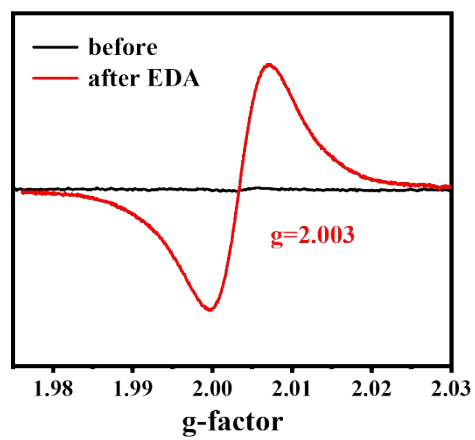

**Fig. S15** ESR spectra of complex **1** before and after reaction with EDA gas.

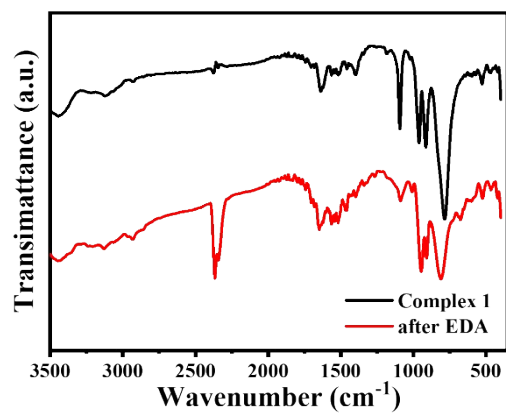

**Fig. S16** FTIR spectra of complex **1** before and after reaction with EDA

gas.

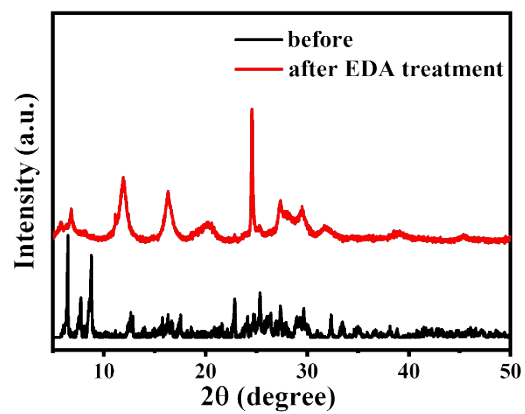

**Fig. S17** PXRD patterns of complex **1** before and after reaction with EDA gas.

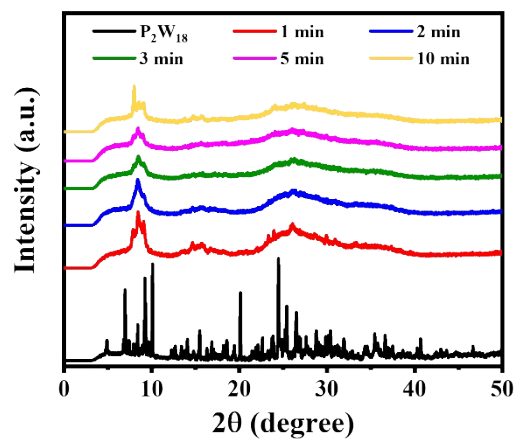

**Fig. S18** PXR D patterns of  $P_2W_{18}$  upon different irradiation time.



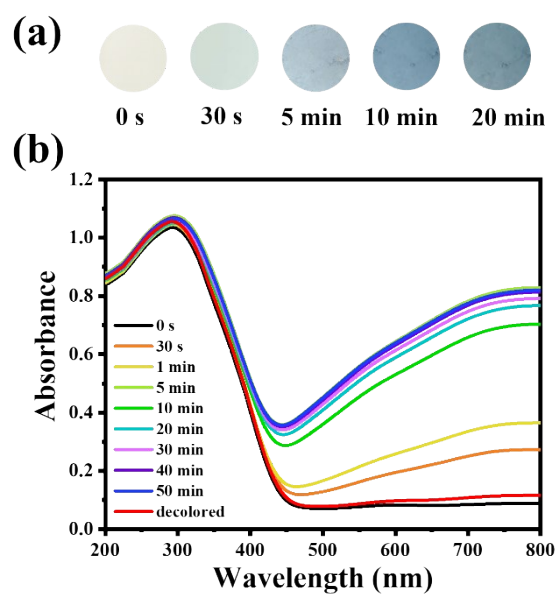

**Fig. S19** Color changes (a) and UV-vis spectra (b) of **1** via different visible light (>400nm) irradiation time.

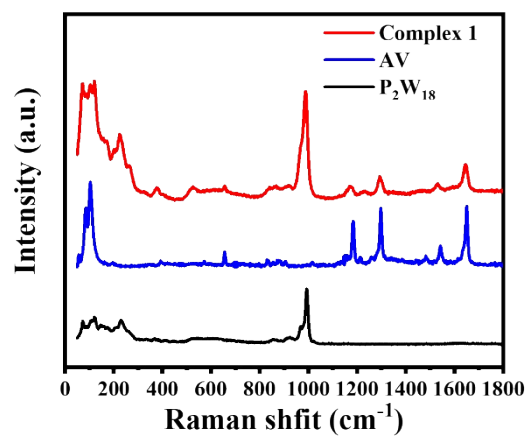

**Fig. S20** Raman spectra of complex **1**, AV and P<sub>2</sub>W<sub>18</sub>.

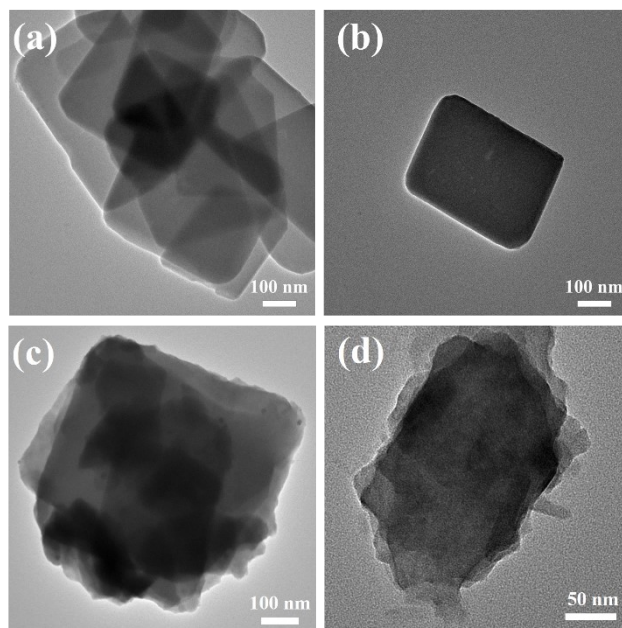

**Fig. S21** TEM diagram of complex **1** before (a, b) and after irradiation (c) and after EDA treatment (d).

**Table S1** Crystal Data and Structure Refinements for compound **1**

|                                     |                                                                                                 |
|-------------------------------------|-------------------------------------------------------------------------------------------------|
| Empirical formula                   | C <sub>16</sub> H <sub>43</sub> N <sub>4</sub> O <sub>71.5</sub> P <sub>2</sub> W <sub>18</sub> |
| Formula weight                      | 4806.06                                                                                         |
| Temperature /K                      | 293(2)                                                                                          |
| Crystal system                      | Orthorhombic                                                                                    |
| Space group                         | <i>Pnna</i>                                                                                     |
| a / Å                               | 12.2103(3)                                                                                      |
| b / Å                               | 22.9104(4)                                                                                      |
| c / Å                               | 27.6227(5)                                                                                      |
| $\alpha$ / deg                      | 90                                                                                              |
| $\beta$ / deg                       | 90                                                                                              |
| $\gamma$ / deg                      | 90                                                                                              |
| Volume / Å <sup>3</sup>             | 7727.2(3)                                                                                       |
| Z                                   | 8                                                                                               |
| D <sub>c</sub> / g cm <sup>-3</sup> | 4.000                                                                                           |
| F (000)                             | 8064.0                                                                                          |
| Reflns collected / unique           | 23740/ 6821                                                                                     |
| R <sub>(int)</sub>                  | 0.0500                                                                                          |
| Goodness-of-fit on F <sup>2</sup>   | 1.034                                                                                           |
| final R indices                     | R <sub>1</sub> = 0.0396                                                                         |
| [I > 2σ(I)]                         | wR <sub>2</sub> = 0.0924                                                                        |
| R indices                           | R <sub>1</sub> = 0.0477                                                                         |
| (All data)                          | wR <sub>2</sub> = 0.0956                                                                        |
| Largest diff. peak / hole           | 1.66 e. Å <sup>3</sup> / -1.97 e. Å <sup>3</sup>                                                |

$${}^a R_I = \sum ||F_o| - |F_c|| / \sum |F_o|, {}^b wR_2 = \{ \sum w[(F_o)^2 - (F_c)^2]^2 / \sum w[(F_o)^2] \}^{1/2}.$$

**Table S2** Selected bond lengths (Å) for complex **1**

| <b>Bond</b>             | <b>Distance/Å</b> | <b>Bond</b>              | <b>Distance/Å</b> |
|-------------------------|-------------------|--------------------------|-------------------|
| W(3)-O(23)              | 1.889(8)          | W(9)-O(15)1              | 1.928(9)          |
| W(3)-O(24) <sup>1</sup> | 1.955(8)          | W(9)-O(21)               | 1.900(8)          |
| W(3)-O(27)              | 1.915(8)          | W(9)-O(24)               | 1.869(8)          |
| W(3)-O(11)              | 2.361(8)          | W(9)-O(31)1              | 1.924(8)          |
| W(3)-O(33)              | 1.710(9)          | W(9)-O(35)               | 1.737(8)          |
| W(4)-O(22)              | 1.897(8)          | W(9)-O(14)1              | 2.347(8)          |
| W(4)-O(26)              | 1.939(8)          | P(10)-O(12)              | 1.536(8)          |
| W(4)-O(28)              | 1.903(8)          | P(10)-O(11)              | 1.518(9)          |
| W(4)-O(30)              | 1.726(9)          | P(10)-O(13)              | 1.536(8)          |
| W(4)-O(32)              | 1.888(8)          | P(10)-O(14)              | 1.580(8)          |
| W(4)-O(13)              | 2.343(8)          | N(45)-C(46)              | 1.502(18)         |
| W(5)-O(17)              | 1.917(9)          | N(45)-C(44)              | 1.355(17)         |
| W(5)-O(18)              | 1.912(8)          | N(45)-C(50)              | 1.355(16)         |
| W(5)-O(27)1             | 1.898(8)          | N(49)-C(48)              | 1.500(18)         |
| W(5)-O(29)              | 1.891(9)          | C(48)-C(47)              | 1.539(19)         |
| W(5)-O(11)1             | 2.402(8)          | C(47)-C(46)              | 1.51(2)           |
| W(5)-O(36)              | 1.712(9)          | C(51)-C(43)              | 1.414(17)         |
| W(6)-O(23)              | 1.899(8)          | C(51)-C(44)              | 1.35(2)           |
| W(6)-O(25)              | 1.912(8)          | C(43)-C(43) <sup>2</sup> | 1.46(2)           |
| W(6)-O(28)              | 1.912(8)          | C(43)-C(42)              | 1.390(17)         |
| W(6)-O(31)              | 1.895(8)          | C(50)-C(42)              | 1.364(19)         |
| W(6)-O(13)              | 2.374(8)          |                          |                   |

Symmetry transformations used to generate equivalent atoms: <sup>1</sup>+X, 3/2-Y, 3/2-Z; <sup>2</sup>3/2-X, 1-Y, +Z

## References

- 1 Christopher. R. G and Richard. G. F, *Inorg. Chem.*, 2008, **47**, 3679-3686.
- 2 M. S. Simon and P. T. Moore, *J. Polym. Sci. Pol. Chem.*, 1975, **13**, 1-16.
- 3 CrysAlisPro 2012, Agilent Technologies. Version 1.171.36.31.
- 4 G. M. Sheldrick, *Acta. Cryst. A*, 2015, **71**, 3-8.
- 5 O. V. Dolomanov, L. J. Bourhis, R. J. Gildea, J. A. K. Howard and H. Puschmann, *J. Appl. Cryst.*, 2009, **42**, 339-341.
- 6 K. Brandenburg, Diamond, 2010.
